# Supplementary material
Source: HighWire-hosted journal article supplement (https://erj.ersjournals.com/content/50/2/1700889)
Supplement: inline-supplementary-material-1 [file inline-supplementary-material-1.pdf]

**Supplemental Table S1:** Treatment regimen initiated within 3 months after PAH diagnosis in the study population (*n=1017*)

|                                                                   | n (%)    |
|-------------------------------------------------------------------|----------|
| Diuretics                                                         | 666 (65) |
| Anticoagulants                                                    | 696 (68) |
| PAH-targeted therapies                                            | 916 (90) |
| Monotherapy, n (%)                                                | 480 (47) |
| ERA, n (%)                                                        | 307 (30) |
| PDE5-I, n (%)                                                     | 151 (15) |
| Prostanoid, n (%)                                                 | 22 (2)   |
| Dual combination therapy, n (%)                                   | 365 (36) |
| ERA + PDE5-I, n (%)                                               | 334 (33) |
| ERA + prostanoid, n (%)                                           | 22 (2)   |
| PDE5-I + prostanoid, n (%)                                        | 9 (1)    |
| Triple combination therapy<br>(ERA + PDE5-I + prostanoids), n (%) | 71 (7)   |
| Calcium channel blockers, n (%)                                   | 102 (10) |
| In monotherapy, n (%)                                             | 72 (7)   |
| Combined with PAH-targeted medication, n (%)                      | 30 (3)   |
| No treatment, n (%)                                               | 29 (3)   |

PAH: pulmonary arterial hypertension; ERA: endothelin-receptor antagonist; PDE5-I: phosphodiesterase type-5 inhibitor

**Supplemental Table S2** – Univariable and multivariable Cox regression analysis of low-risk criteria assessed at first re-evaluation in the subset of patients with available SvO<sub>2</sub> measurements (*n*=606)

|                                          | Univariable analysis |             |         | Multivariable analysis |             |         |
|------------------------------------------|----------------------|-------------|---------|------------------------|-------------|---------|
|                                          | HR                   | 95%CI       | p-value | HR                     | 95%CI       | p-value |
| WHO/NYHA FC I-II                         | 0.26                 | 0.19 – 0.35 | < 0.001 | 0.44                   | 0.31 – 0.61 | < 0.001 |
| 6-minute walk distance > 440m            | 0.20                 | 0.13 – 0.31 | < 0.001 | 0.36                   | 0.22 – 0.57 | < 0.001 |
| Right atrial pressure < 8 mmHg           | 0.44                 | 0.32 – 0.59 | < 0.001 | 0.67                   | 0.49 – 0.92 | 0.012   |
| Cardiac index ≥ 2.5 L/min/m <sup>2</sup> | 0.49                 | 0.36 – 0.66 | < 0.001 |                        |             |         |
| SvO <sub>2</sub> > 65%                   | 0.29                 | 0.21 – 0.40 | < 0.001 | 0.53                   | 0.38 – 0.74 | < 0.001 |

WHO/NYHA FC: World Health Organisation/New York Heart Association functional class;  
 HR: Hazard ratio; 95%CI: 95% confidence interval; SvO<sub>2</sub>: mixed venous oxygen saturation
