# Supplementary material
Source: HighWire-hosted journal article supplement (https://erj.ersjournals.com/content/50/2/1700889)
Supplement: inline-supplementary-material-2 [file inline-supplementary-material-2.pdf]

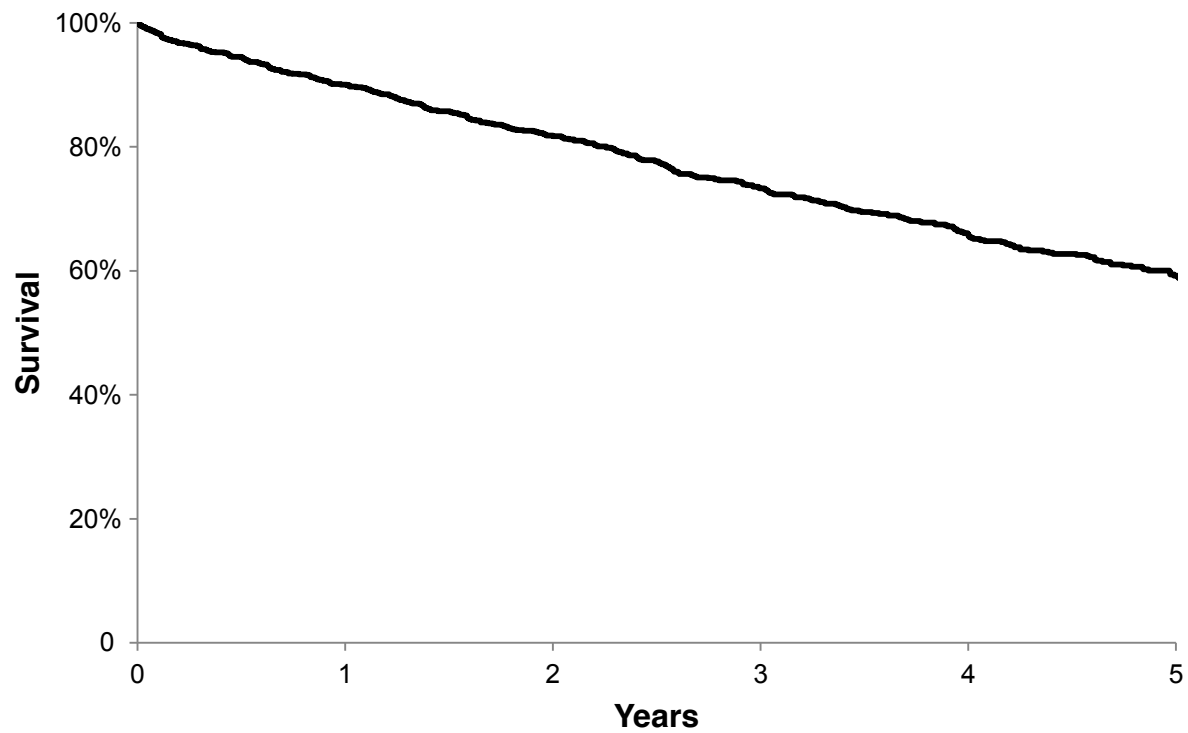

|                     |      |      |     |     |     |     |
|---------------------|------|------|-----|-----|-----|-----|
| Patients at risk, n | 1591 | 1063 | 823 | 605 | 417 | 285 |
| Overall survival    |      | 90%  | 82% | 73% | 66% | 59% |
