# Supplementary material
Source: HighWire-hosted journal article supplement (https://erj.ersjournals.com/content/50/2/1700889)
Supplement: inline-supplementary-material-3 [file inline-supplementary-material-3.pdf]

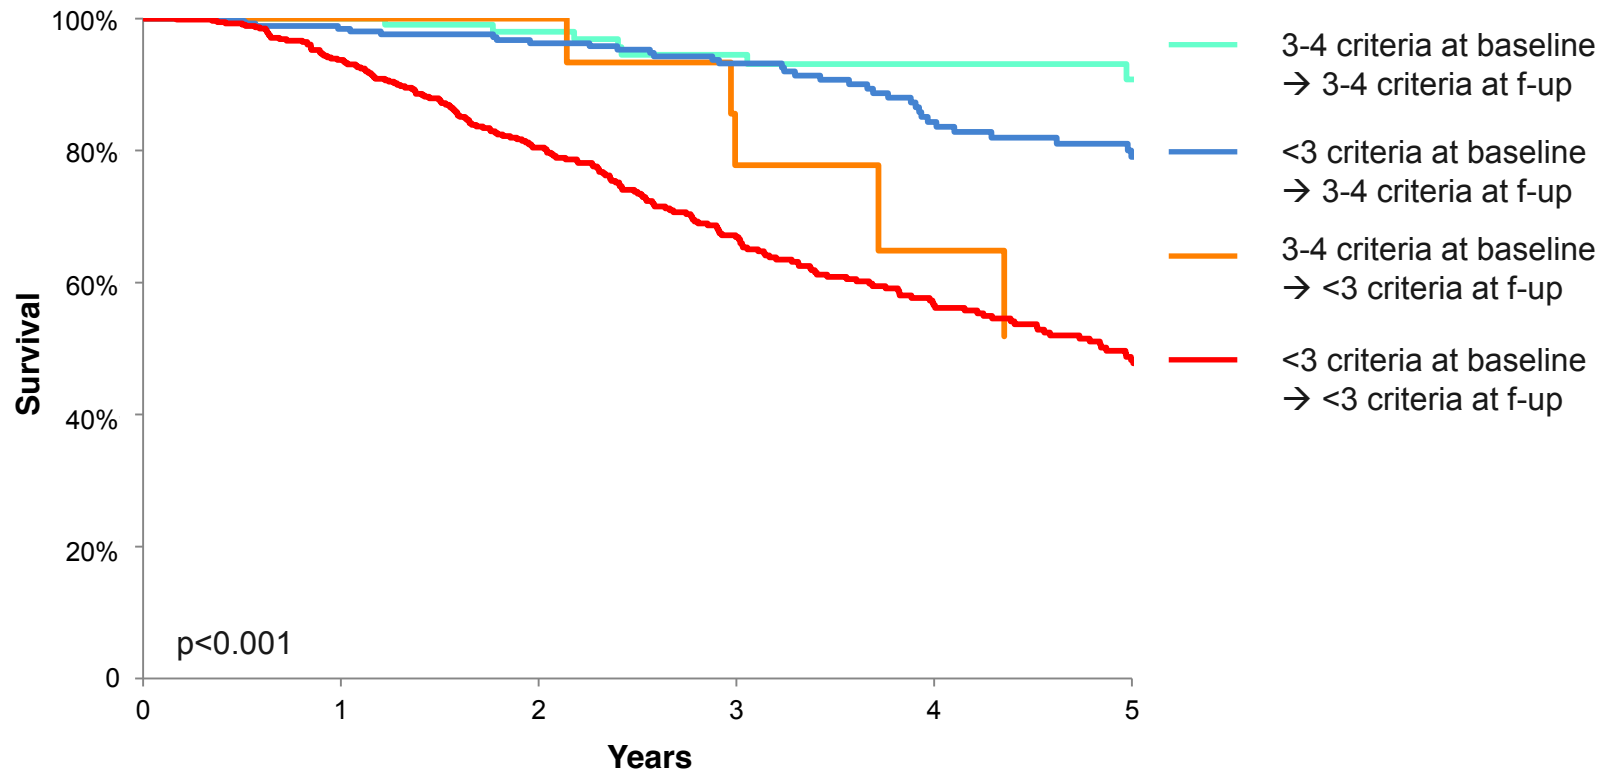

|                    |     |     |     |     |     |     |
|--------------------|-----|-----|-----|-----|-----|-----|
| 3-4 → 3-4 criteria | 131 | 110 | 91  | 74  | 51  | 40  |
| <3 → 3-4 criteria  | 293 | 248 | 215 | 170 | 115 | 82  |
| 3-4 → <3 criteria  | 25  | 21  | 16  | 10  | 5   | 2   |
| <3 → <3 criteria   | 568 | 443 | 328 | 226 | 153 | 104 |
