# Supplementary material
Source: HighWire-hosted journal article supplement (https://erj.ersjournals.com/content/50/2/1700889)
Supplement: inline-supplementary-material-4 [file inline-supplementary-material-4.pdf]

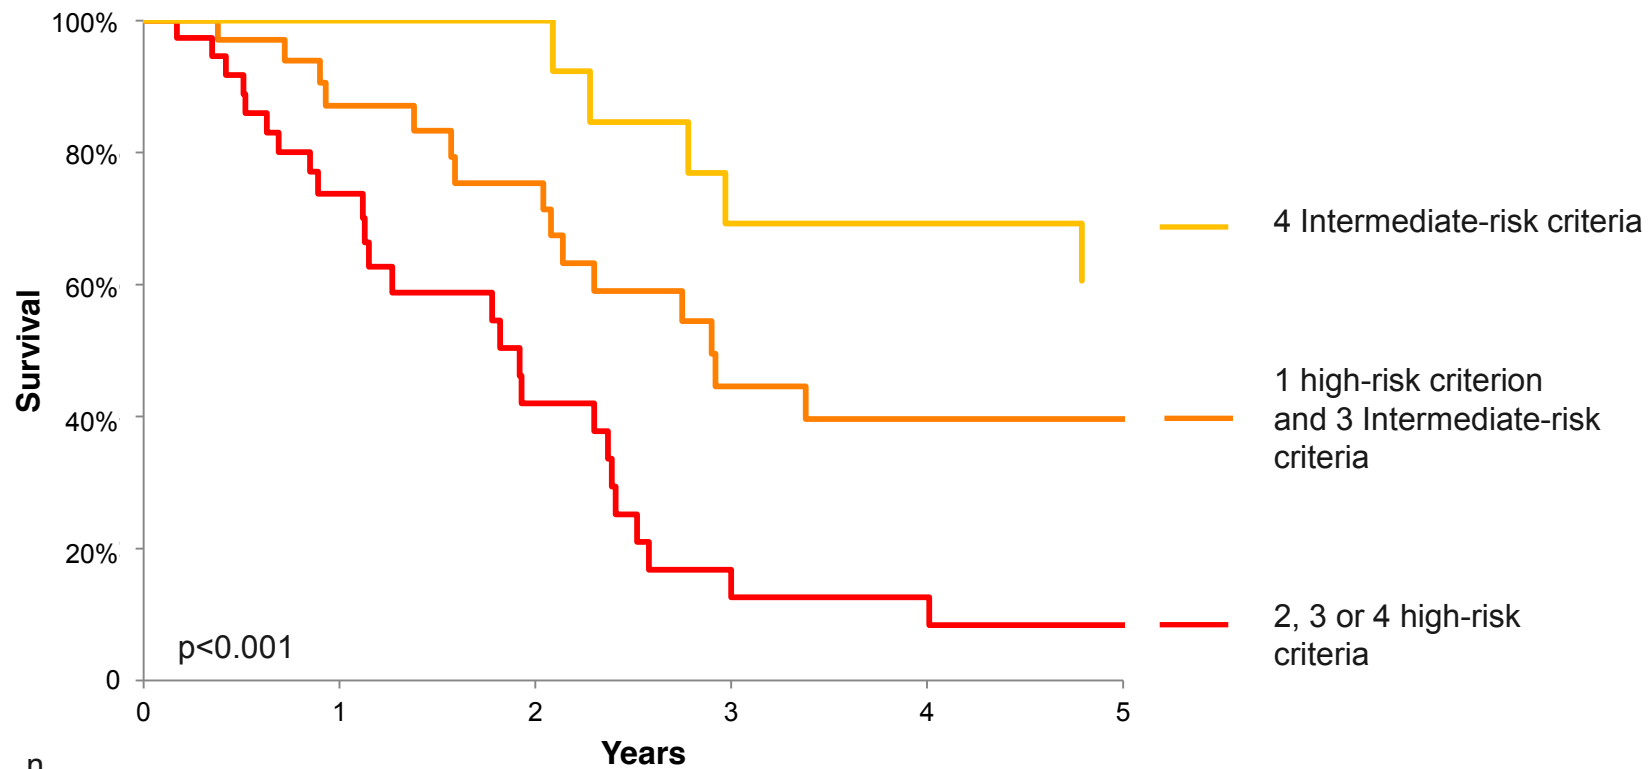

Patients at risk, n

|                              |    |    |    |    |   |   |
|------------------------------|----|----|----|----|---|---|
| 4 intermediate criteria      | 20 | 15 | 9  | 10 | 8 | 6 |
| 1 high-risk criterion        | 37 | 26 | 19 | 9  | 7 | 6 |
| 2, 3 or 4 high-risk criteria | 38 | 22 | 11 | 4  | 3 | 2 |
